# Supplementary material for: New device reduces conductor burndown on distribution circuits
Source: Royal Society of Chemistry journal article supplement (doi:10.1039/d1cp00321f), 1980-08-01
Supplement: d1cp00321f1.pdf [file d1cp00321f1.pdf]

## Supporting Information

A novel shift in the glass transition temperature of polymer nanocomposites: A molecular dynamics simulation study

Raja Azhar Ashraaf Khan,<sup>a</sup> Xian Chen,<sup>a</sup> Hang-Kai Qi,<sup>a</sup> Jian-Hua Huang,<sup>b</sup> Meng-Bo Luo<sup>\*a</sup>

<sup>a</sup> Zhejiang Province Key Laboratory of Quantum Technology and Device, Department of Physics, Zhejiang University, Hangzhou 310027, China

<sup>b</sup> Department of Chemistry, Zhejiang Sci-Tech University, Hangzhou 310018, China.

Corresponding Author

\* Meng-Bo Luo (luomengbo@zju.edu.cn)

### 1. Diffusion of NP in polymer solution

We have simulated a single NP diffusion in polymer solution. In the system of size  $40 \times 40 \times 40$ , we put 44 polymer chains of length 64. Here size of NP is  $\sigma_{\text{NP}} = 1$ . The density of polymer monomers is about 4.4%. The interactions between NP and polymer and between polymer and polymer are purely repulsive for simplification. NVT simulations are performed at temperature  $T = 1$ . The results of mean square displacement (MSD) of NP at different time ( $t$ ) is present in **Figure S1** for NP of mass 1 and 100. We find the diffusion of NPs decreases with increasing NP's mass.

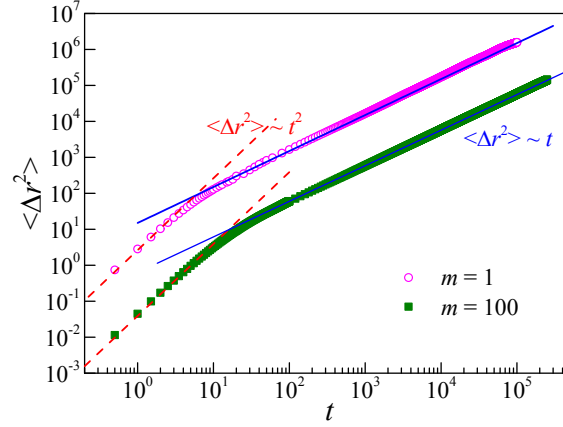

**Figure S1.** Plot of the mean square displacement of the NPs as a function of time for single NP in polymer solution at temperature  $T = 1$ .

## 2. Dependence of $T_g$ on polymer chain length

We have checked the dependence of  $T_g$  on the polymer chain length for the pure polymer system. The result of the influence of polymer chain length on  $T_g$  is plotted in **Figure S2**. During the simulations, the number of polymer chains,  $n = 44$ , is fixed while the length of the polymer chain,  $N$ , is varied from 34 to 114. We find  $T_g$  increases with polymer length, in agreement with experimental results.<sup>1</sup> The polymer length dependence of  $T_g$  can be well fitted to the empirical Fox-Flory equation<sup>2</sup>

$$T_g(N) = T_g^\infty - \frac{C}{N} \quad (1)$$

We estimate  $T_g^\infty = 0.525$  for infinitely long polymer chain.

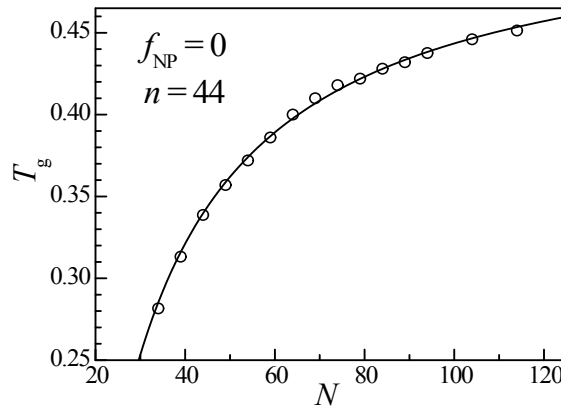

**Figure S2.** Simulation results for the variation of  $T_g$  with chain length  $N$  for the pure polymer system ( $f_{\text{NP}} = 0$ ) with the number of polymer chains  $n = 44$ . The solid line is the best fit by the

empirical Fox-Flory equation (Eq. 1).

**References:**

[1] J. Hintermeyer, A. Herrmann, R. Kahlau, C. Goiceanu and E. Rossler, *Macromolecules*, 2008, **41**, 9335–9344.

[2] J.-L. Barrat, J. Baschnagel and A. Lyulin, *Soft Matt.*, 2010, **6**, 3430–3446.
